# Supplementary material for: A Lagrangian advection scheme with shape matrix (LASM) for solving advection problems
Source: Copernicus journal article supplement (doi:10.5194/gmd-7-2951-2014), 2014-12-12
Supplement: Supplementary file 1 [file gmd-7-2951-2014-supplement.zip]

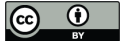

*Supplement of*

## **A Lagrangian advection scheme with shape matrix (LASM) for solving advection problems**

**L. Dong et al.**

*Correspondence to:* L. Dong (dongli@lasg.iap.ac.cn)

- [gmd-7-2951-2014-supplement-cover-letter.pdf](#)
- [\\_\\_MACOSX](#)
  - [.\\_lasm.barotropic.240x120.step.cells.gif](#)
- [lasm.barotropic.240x120.step.cells.gif](#)
